# Supplementary material
Source: Elsevier journal article supplement (https://www.sciencedirect.com/science/article/pii/S0300289623000078)
Supplement: mmc1 [file S0300289623000078:mmc1.docx]

Title:

Prevalence and risk factors for airflow limitation in patients with acute coronary syndrome

**eTable 1 Prevalence of Lung Function Abnormalities According to Anemia and NT-proBNP in Patients with Acute Coronary Syndrome**

| Patients | Normal lung function | Restrictive lung function | Previously diagnosed AL | Undiagnosed AL |
| --- | --- | --- | --- | --- |
| All (n = 258) | 76.4 (71.2–81.6) | 8.1 (4.8–11.4) | 3.9 (1.6–6.2) | 11.6 (7.7–15.5) |
| Anemia |  |  |  |  |
| No (n = 208) | 82.2 (77.0–87.4) | 6.3 (3.0–9.6) | 2.4 (0.4–4.4) | 9.1 (5.2–12.0) |
| Yes (n = 50) | 52.0 (38.2–65.8)b | 16.0 (5.8–26.2)b | 10.0 (1.7–18.3)b | 22.0 (10.5–33.5)b |
| NT-proBNP >500 pg/mla |  |  |  |  |
| No (n = 167) | 82.0 (76.2–87.8) | 6.0 (2.4–9.6) | 2.4 (0.1–4.7) | 9.6 (5.1–14.1) |
| Yes (n = 79) | 65.8 (55.3–76.3)c | 12.7 (5.4–20.0) | 6.3 (1.0–11.6) | 15.2 (7.3–23.1) |
| ≥ 10 pack-years (n = 172) |  |  |  |  |
| Anemia |  |  |  |  |
| No (n = 135) | 75.6 (68.4–82.8) | 7.4 (3.0–11.8) | 3.7 (0.6–6.8) | 13.3 (7.6–19.0) |
| Yes (n = 37) | 54.1 (38.1–70.1)b | 8.1 (0.1–16.1) | 13.5 (2.5–24.5)b | 24.3 (10.5–38.1) |
| NT-proBNP >500 pg/mla |  |  |  |  |
| No (n = 117) | 79.5 (72.2–86.8) | 5.1 (1.1–9.1) | 3.4 (0.2–6.8) | 12.0 (6.1–17.9) |
| Yes (n = 47) | 51.1 (36.8–65.4)c | 14.9 (4.7–25.1)c | 10.6 (2.0–19.2) | 23.4 (11.3–25.5) |

Data are presented as % (95% CI). AL = airflow limitation, and NT-proBNP = N-terminal pro B-type natriuretic peptide.

a Missing data: 12 in all patients and 8 in ≥10 pack-years patients.

b vs no anemia, *P* < .05.

c vs no Nt-proBNP >500 pg/ml, *P* < .05.
